# Supplementary material for: Ratiometric colorimetric detection of fluoride ions using a schiff base sensor: enhancing selectivity and sensitivity for naked-eye analysis
Source: Royal Society of Chemistry journal article supplement (doi:10.1039/d3ay00541k), 2023-01-01
Supplement: d3ay00541k1.pdf [file d3ay00541k1.pdf]

### Supplementary Information

#### **Ratiometric Colorimetric Detection of Fluoride Ions using Schiff Base Sensor: Enhancing Selectivity and Sensitivity for Naked-Eye Analysis**

Anusha A. Mahishi<sup>a§</sup>, Sachin M. Shet<sup>b§</sup>, Padmaja V Mane<sup>a</sup>, Jingxian Yu<sup>c,d</sup>, A. V. E. Sowrirraajan<sup>e</sup>, Madhuprasad Kigga<sup>a\*</sup>, Mahesh P. Bhat<sup>f\*</sup>, Kyeong-Hwan Lee<sup>f,g,h,\*</sup>, Mahaveer D. Kurkuri<sup>a,\*</sup>

<sup>a</sup> Centre for Research in Functional Materials (CRFM), JAIN (Deemed-to-be University), Jain Global Campus, Bengaluru 562112, India

<sup>b</sup> Centre for Nano and Material Sciences, JAIN (Deemed-to-be University), Jain Global Campus, Bengaluru 562112, India

<sup>c</sup> Guangxi Key Laboratory of Electrochemical and Magneto-chemical Functional Materials, College of Chemistry and Bioengineering, Guilin University of Technology, Guilin 541004, PR China

<sup>d</sup> Department of Chemistry, School of Chemistry, Physics and Earth Sciences, The University of Adelaide, Adelaide, SA 5005, Australia

<sup>e</sup> Fire and Combustion Research Center, Jain Deemed to be University, Kanakapura Road, Bangalore, India

<sup>f</sup> Agricultural Automation Research Centre, Chonnam National University, Gwangju 61186, South Korea.

<sup>g</sup> Department of Convergence Biosystems Engineering, Chonnam National University, Gwangju 61186, Republic of Korea.

<sup>h</sup> BK21 Interdisciplinary Program in IT-Bio Convergence System, Chonnam National University, Gwangju 61186, Republic of Korea

\*Corresponding author E-mail address: maheshbhat1306@gmail.com; khlee@jnu.ac.kr; madhuprasadab@gmail.com; mahaveer.kurkuri@jainuniversity.ac.in

§ Anusha A. Mahishi and Sachin M. Shet contributed equally

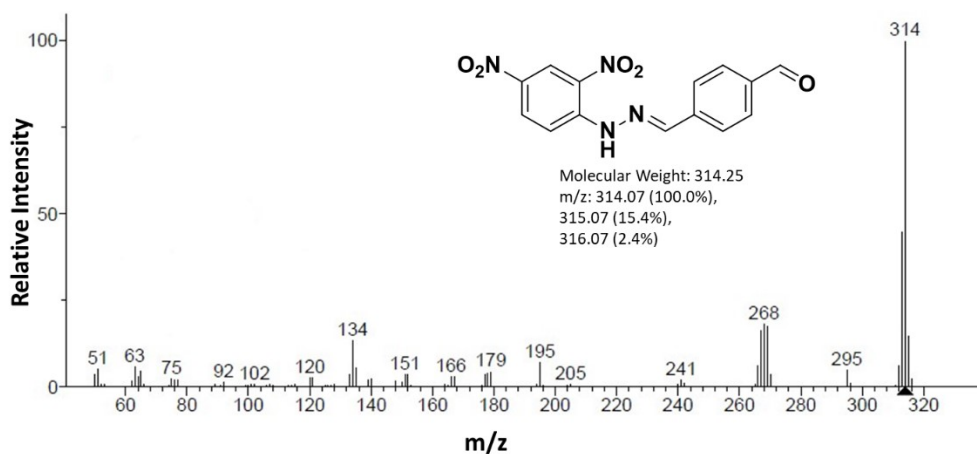

**Fig. S1:** GCMS spectrum of the receptor.

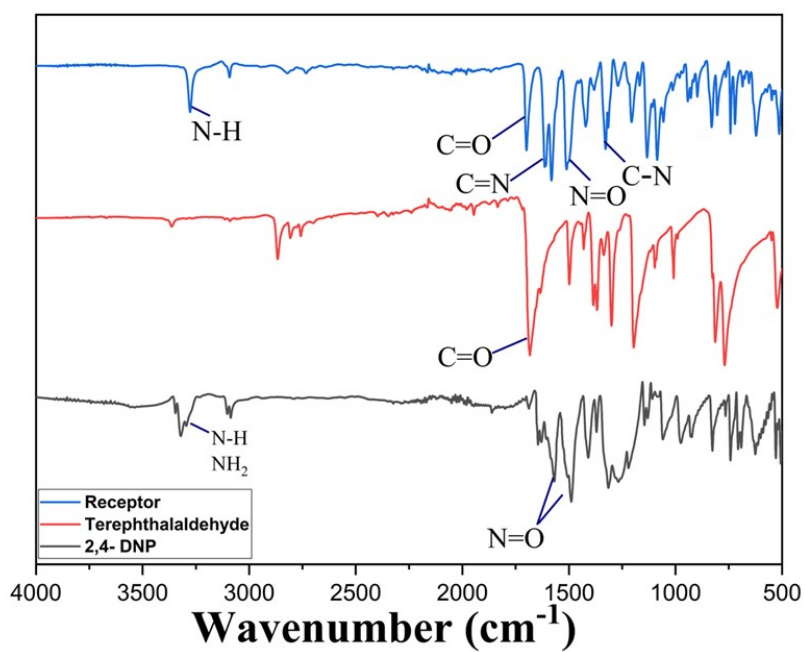

**Fig. S2:** FTIR spectra of 2,4-Dinitrophenylhydrazine, terephthalaldehyde, and receptor.

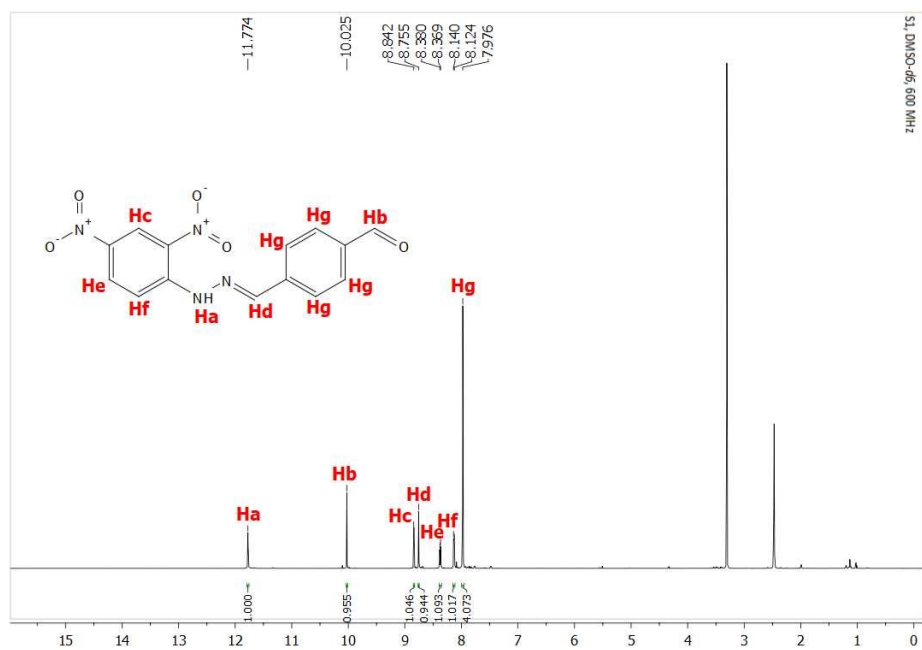

**Fig. S3:**  $^1\text{H}$  NMR spectrum of the receptor.

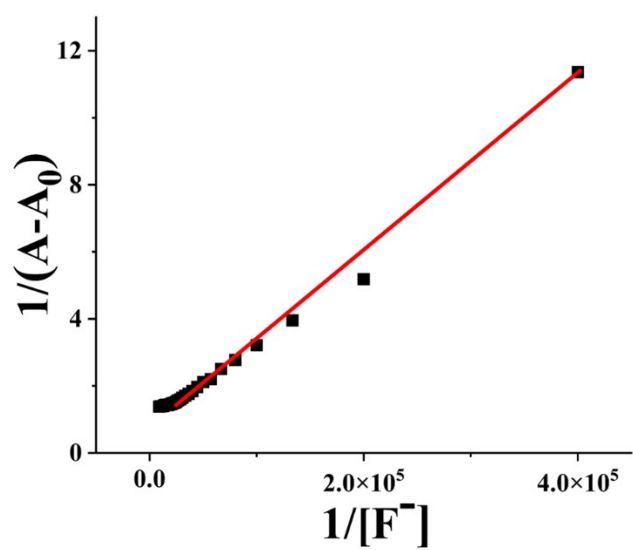

**Fig. S4:** Benesi–Hildebrand plot for receptor binding with  $\text{F}^-$  ions associated with absorbance change at 543 nm.

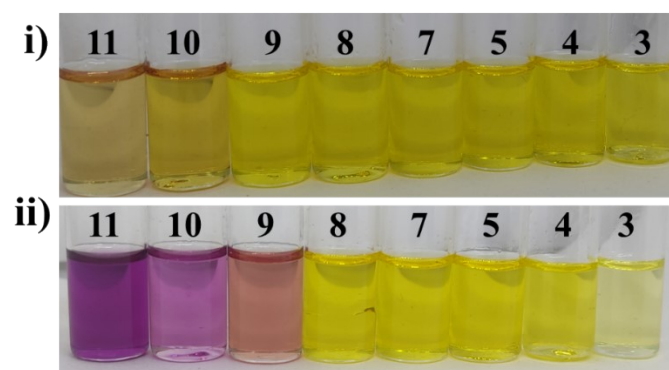

**Fig. S5:** pH studies for receptor from pH 3-11 (i) Visual color change observed for the receptor in mentioned pH, (ii) Visual color change observed for receptor +  $F^-$  in mentioned pH.

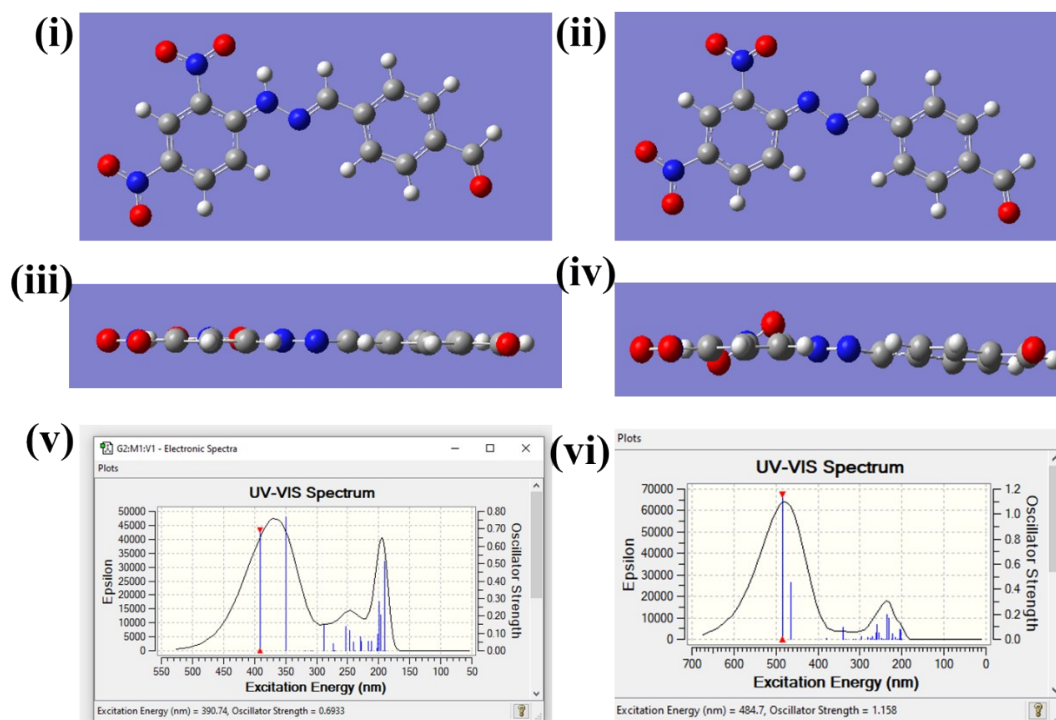

**Fig. S6:** Computational evidence, (i) 3D- front view of the receptor, (ii) 3D- front view of the deprotonated receptor, (iii) 3D- side view of the receptor, (iv) 3D- side view of the deprotonated receptor (v) Theoretically calculated UV-vis spectrum of the receptor, (vi) Theoretically calculated UV-vis spectrum of the deprotonated receptor.

**Table S1:** RGB% values obtained from the smartphone app for the color change after the addition of different anions.

| Different anions                            | RGB%  |        |       |
|---------------------------------------------|-------|--------|-------|
|                                             | Red % | Green% | Blue% |
| Receptor                                    | 68    | 98     | 28    |
| F <sup>-</sup>                              | 71    | 1      | 78    |
| Cl <sup>-</sup>                             | 87    | 99     | 33    |
| Br <sup>-</sup>                             | 87    | 98     | 29    |
| I <sup>-</sup>                              | 87    | 99     | 31    |
| HSO <sub>4</sub> <sup>-</sup>               | 86    | 99     | 33    |
| H <sub>2</sub> PO <sub>4</sub> <sup>-</sup> | 86    | 96     | 40    |
| AcO <sup>-</sup>                            | 79    | 16     | 61    |

**Table S2:** RGB% values obtained from the smartphone app for the color change after the addition of various concentrations of F<sup>-</sup> in TBA salt form.

| Different equiv.<br>addition of F <sup>-</sup> | RGB%  |        |       |
|------------------------------------------------|-------|--------|-------|
|                                                | Red % | Green% | Blue% |
| 0                                              | 99    | 94     | 30    |
| 0.1                                            | 96    | 72     | 46    |
| 0.2                                            | 94    | 44     | 54    |
| 0.3                                            | 90    | 27     | 64    |
| 0.4                                            | 86    | 4      | 74    |
| 0.5                                            | 83    | 0      | 84    |
| 0.6                                            | 79    | 0      | 95    |

|     |    |   |    |
|-----|----|---|----|
| 0.7 | 78 | 0 | 94 |
| 0.8 | 72 | 0 | 95 |
| 0.9 | 69 | 0 | 96 |
| 1   | 65 | 0 | 95 |

---

**Table S3:** RGB% values obtained from the smartphone app for the color change after the addition of different samples of  $F^-$ .

| <b>Different samples of <math>F^-</math></b> | <b>RGB%</b>  |               |              |
|----------------------------------------------|--------------|---------------|--------------|
|                                              | <b>Red %</b> | <b>Green%</b> | <b>Blue%</b> |
| Receptor                                     | 68           | 98            | 28           |
| Receptor + 1 ppm NaF                         | 86           | 53            | 44           |
| Receptor + mouthwash (100 times diluted)     | 62           | 2             | 60           |
| Receptor + 10 ppm NaF                        | 48           | 0             | 59           |

---
